# Supplementary material for: Synthesis, antimicrobial activity and molecular simulation of thiourea derivatives containing 6-carboalkoxybenzo[d]thiazole andd-glucose moieties
Source: Royal Society of Chemistry journal article supplement (doi:10.1039/d3nj04443b), 2023-01-01

**Electronic Supplementary Information (ESI) for**  
**Synthesis, antimicrobial activity and molecular simulation of thiourea derivatives containing**  
**6-carboalkoxybenzo[d]thiazole and D-glucose moieties**

Nguyen Dinh Thanh<sup>a\*</sup>, Do Son Hai<sup>a,b</sup>, Nguyen Thi Kim Giang<sup>a,b</sup>, Vu Ngoc Toan<sup>a,c</sup>, Hoang Thi Kim Van<sup>a,d</sup>, Nguyen Minh Tri<sup>a,c</sup>, Duong Ngoc Toan,<sup>a,c</sup>

<sup>a</sup> *Faculty of Chemistry, VNU University of Science (Vietnam National University, Ha Noi), 19 Le Thanh Tong, Hoan Kiem, Ha Noi, Viet Nam*

<sup>b</sup> *Institute of Science and Technology, Ministry of Public Security of Vietnam, 47 Pham Van Dong, Cau Giay, Ha Noi, Viet Nam*

<sup>c</sup> *Institute of New Technology, Military Institute of Science and Technology, 17 Hoang Sam, Cau Giay, Ha Noi, Viet Nam*

<sup>d</sup> *Faculty of Chemical Technology, Viet Tri University of Industry, Tien Kien, Lam Thao, Phu Tho, Viet Nam*

<sup>e</sup> *Faculty of Chemistry, Thai Nguyen University of Education, Address: 20 Luong Ngoc Quyen, Thai Nguyen, Viet Nam*

\*Correspondence:

Dr Nguyen Dinh Thanh, Faculty of Chemistry, VNU University of Science (Vietnam National University, Ha Noi), 19 Le Thanh Tong, Hoan Kiem, Ha Noi, Viet Nam

Email: [nguyendinhthanh@hus.edu.vn](mailto:nguyendinhthanh@hus.edu.vn)

### 1. General procedure for the synthesis of alkyl 2-aminobenzo[d]thiazole-6-carboxylates (2a-i)

2-Aminobenzo[d]thiazole-6-carboxylic esters (**2a-i**) were prepared from 4-aminobenzoic acid (**1a-i**) and appropriate alcohols by modifying literature synthetic procedure.[1, 2] To a solution of appropriate ester 4-aminobenzoates (**2a-i**, 0.1 mol) in glacial acetic acid (100 mL), ammonium thiocyanate (0.2 mol, 15.2 g) was added with stirring in ice bath. The reaction mixture was cooled to 5°C, and a solution of bromine (4.8 mL, 0.093 mol) in acetic acid (25 mL) was added dropwise with stirring. A yellow suspension was appeared. The reaction mixture was then stirred at room temperature for 30 min more. The yellow precipitates were filtered and dissolved in cold water (100 mL). The obtained solution was neutralized using 25% ammonia solution to pH 8. The product was filtered, washed by cold water, and crystallized from 96% ethanol to afford the titled 2-aminobenzo[d]thiazoles **3a-i** that were displayed as follows.

#### *Methyl 2-aminobenzo[d]thiazole-6-carboxylate (3a)*

Pale-yellow crystals from methyl *p*-aminobenzoate (**2a**, 0.1 mol, 15.1 g). Yield: 11.6 g (56%); M.p.: 192–193°C, ref. [3]:193°C.

#### *Ethyl 2-aminobenzo[d]thiazole-6-carboxylate (3b)*

Pale-yellow crystals from ethyl *p*-aminobenzoate (**2b**, 0.1 mol, 16.5 g). Yield: 11 g (50%); M.p.: 243–245°C, ref. [3]: 244–245°C.

#### *Propyl 2-aminobenzo[d]thiazole-6-carboxylate (3c)*

Pale-yellow crystals from *n*-propyl *p*-aminobenzoate (**2c**, 0.1 mol, 17.9 g). Yield: 17.5 g (74%); M.p.: 208–209°C, ref. [3]: 209°C.

#### *Isopropyl 2-aminobenzo[d]thiazole-6-carboxylate (3d)*

Pale-yellow crystals from isopropyl *p*-aminobenzoate (**2d**, 0.1 mol, 17.9 g). Yield: 16. g (68%); M.p.: 206–208°C, ref. [3]: 208°C.

#### *Butyl 2-aminobenzo[d]thiazole-6-carboxylate (3e)*

Pale-yellow crystals from *n*-butyl *p*-aminobenzoate (**2e**, 0.1 mol, 19.3 g). Yield: 16.5 g (66%); M.p.: 205–206°C, ref. [3]: 206°C.

#### *Isobutyl 2-aminobenzo[d]thiazole-6-carboxylate (3f)*

Pale-yellow crystals from isobutyl *p*-aminobenzoate (**2f**, 0.1 mol, 19.3 g). Yield: 17.0 g (68%); M.p.: 187–188°C.

#### *Pentyl 2-aminobenzo[d]thiazole-6-carboxylate (3g)*

Pale-yellow crystals from *n*-pentyl *p*-aminobenzoate (**2g**, 0.1 mol, 20.7 g). Yield: 19.0 g (72%); M.p.: 190–192°C.

*Isopentyl 2-aminobenzo[d]thiazole-6-carboxylate (3h)*

Pale-yellow crystals from isopentyl *p*-aminobenzoate (**2h**, 0.1 mol, 20.7 g). Yield: 18.5 g (70%); M.p.: 188–189°C.

*Octyl 2-aminobenzo[d]thiazole-6-carboxylate (3i)*

Pale-yellow crystals from octyl *p*-aminobenzoate (**2i**, 0.1 mol, 20.7 g). Yield: 15.9 g (52%); M.p.: 160–162°C.

References

- [1] M. Durcik, Ž. Toplak, N. Zidar, J. Ilaš, A. Zega, D. Kikelj, L.P. Mašič, T. Tomašič, Efficient Synthesis of Hydroxy-Substituted 2-Aminobenzo[d]thiazole-6-carboxylic Acid Derivatives as New Building Blocks in Drug Discovery, *ACS Omega* 5(14) (2020) 8305-8311.
- [2] R.V. Patel, S.W. Park, Catalytic N-formylation for synthesis of 6-substituted-2-benzothiazolylimino-5-piperazinyl-4-thiazolidinone antimicrobial agents, *Res. Chem. Intermed.* 41(8) (2015) 5599-5609.
- [3] S.S. Naim, S.K. Singh, S. Sharma, *ChemInform Abstract: Studies in Antiparasitic Agents. Part 17. Synthesis of 2-Acylamino-6- substituted-benzothiazoles as Potential Anthelmintic Agents*, *ChemInform* 22(31) (1991).

## 2. NMR and MS of thioureas 4a-i

*1-(2,3,4,6-Tetra-O-acetyl-β-D-glucopyranosyl)-3-(6-carbomethoxybenzo[d]thiazole-2-yl)thiourea*  
(4a)

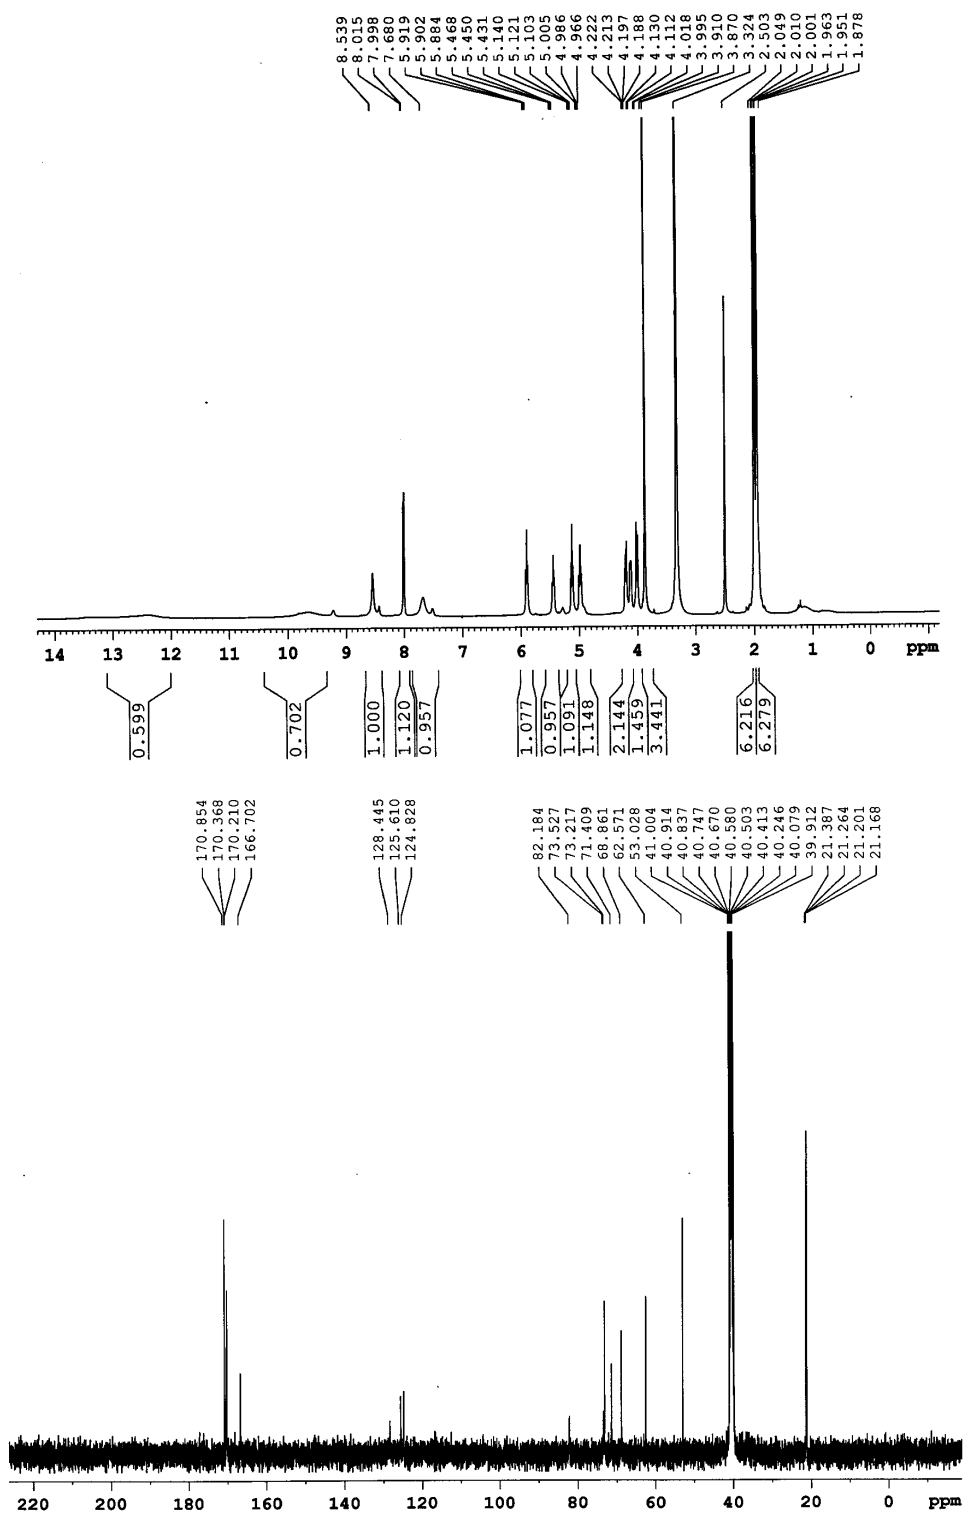

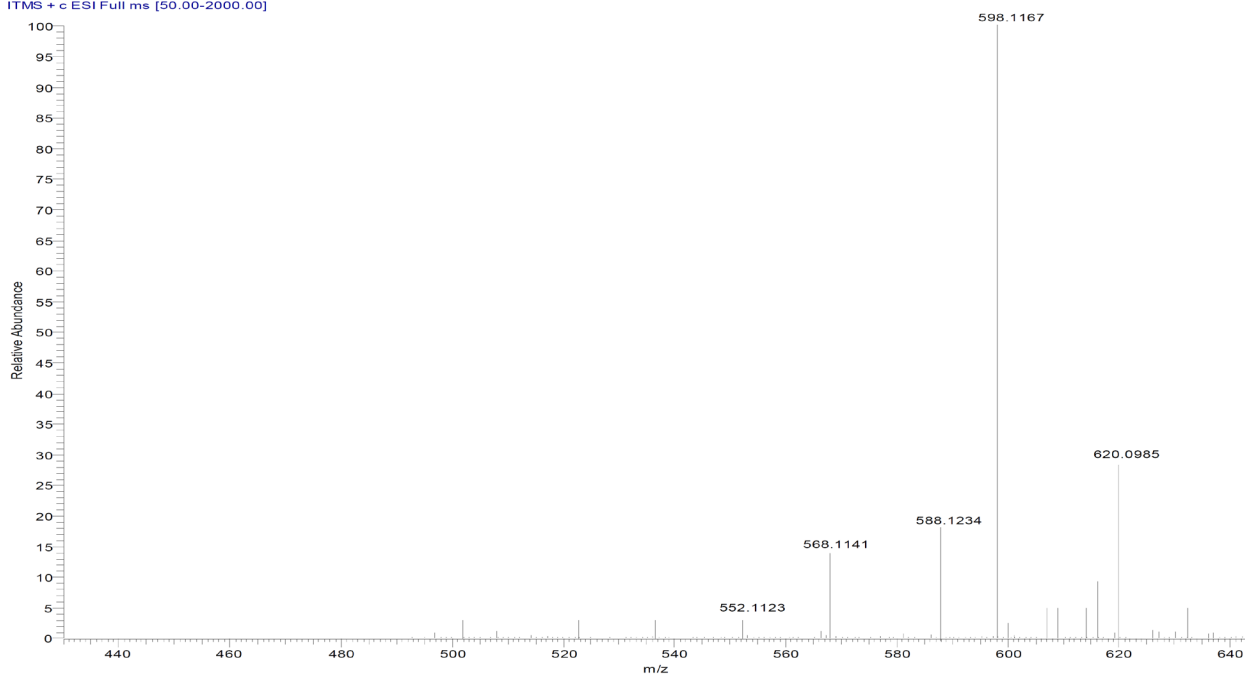

## HPLC

| No. | RT    | Area (%) | Concentration (%) | BC  |
|-----|-------|----------|-------------------|-----|
| 1   | 2.000 | 302963   | 1.384             | BV  |
| 2   | 2.940 | 102967   | 0.470             | VV  |
| 3   | 3.087 | 520051   | 2.421             | VV  |
| 4   | 3.307 | 20931637 | 95.623            | VV  |
| 5   | 5.013 | 22165    | 0.101             | TBB |
|     |       | 21889783 | 100.00            |     |

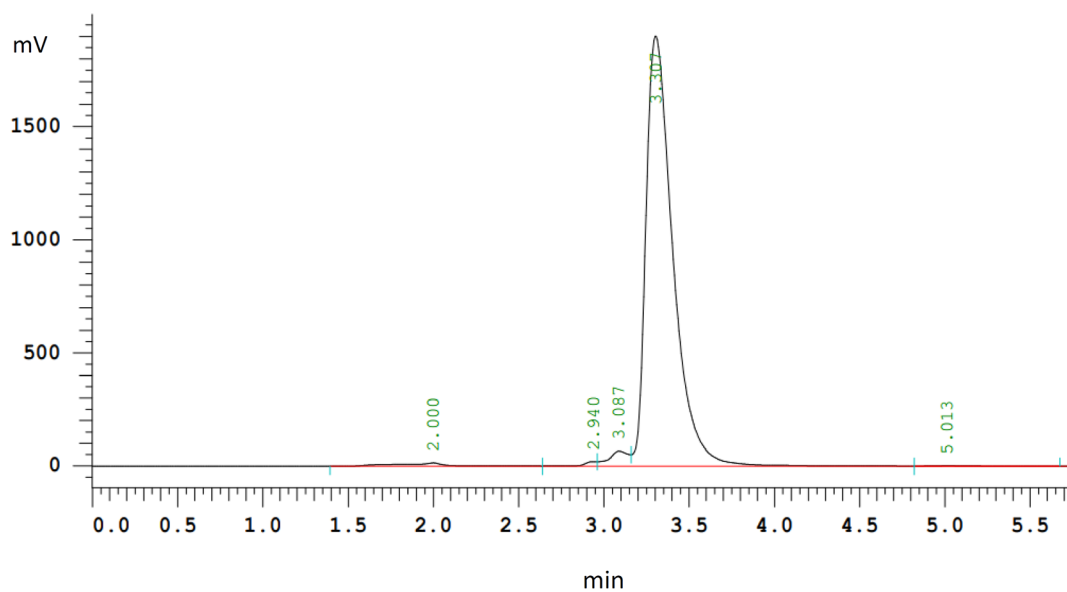

*1-(2,3,4,6-Tetra-O-acetyl-β-D-glucopyranosyl)-3-(6-carboethoxybenzo[d]thiazole-2-yl)thiourea*  
(4b)

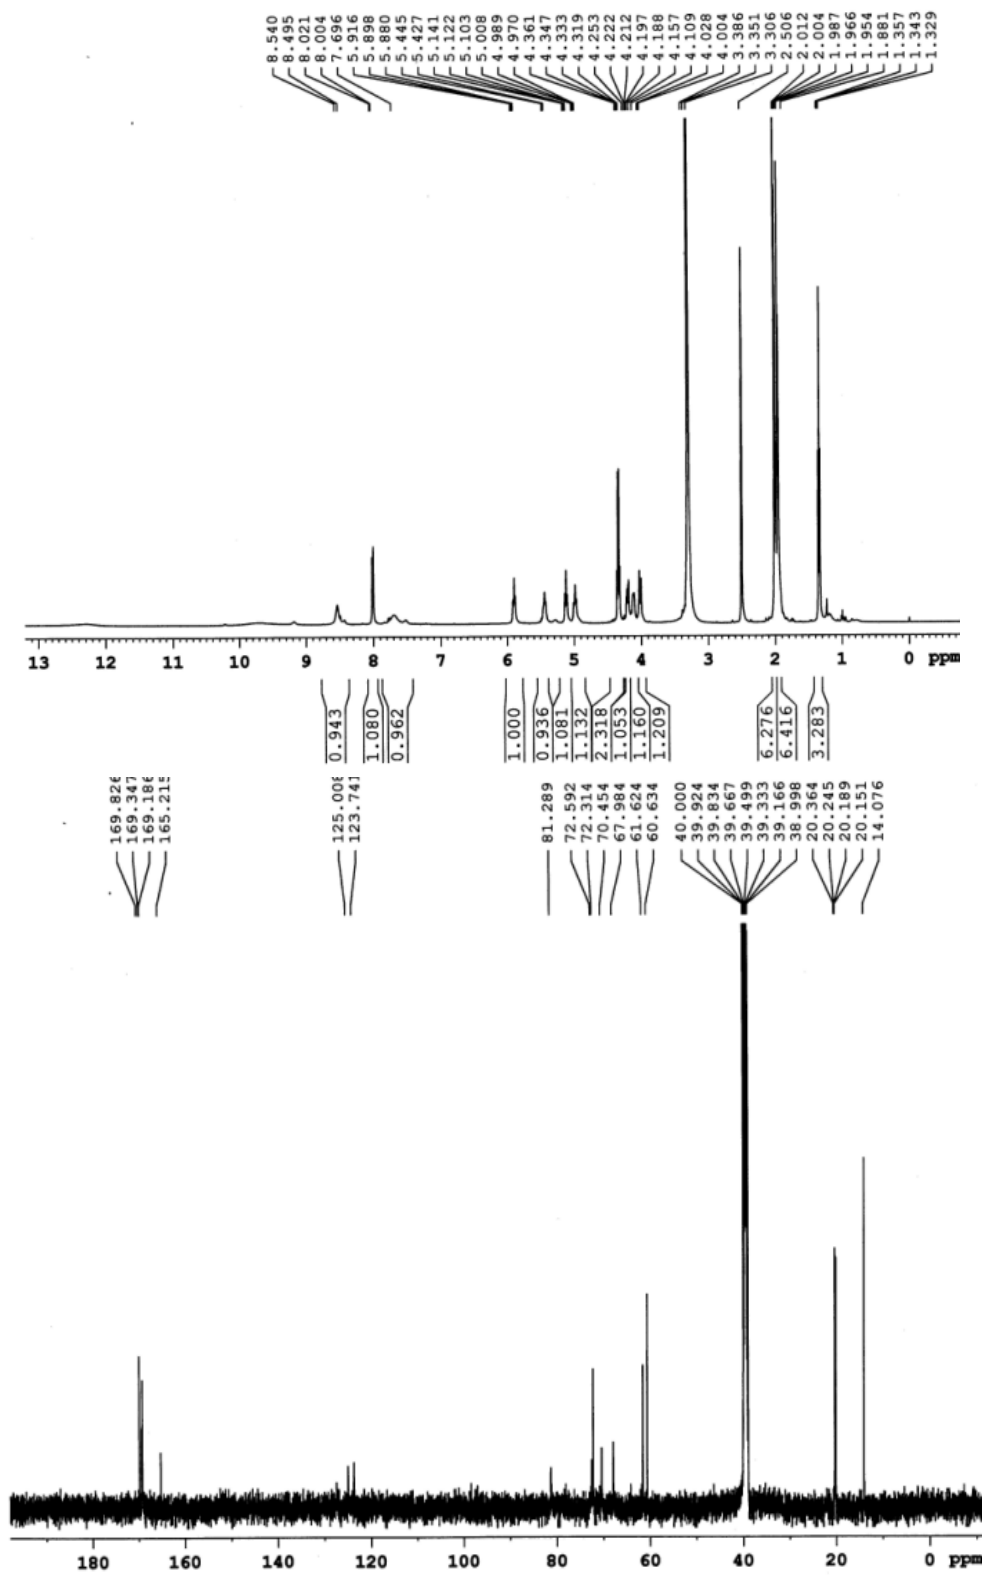

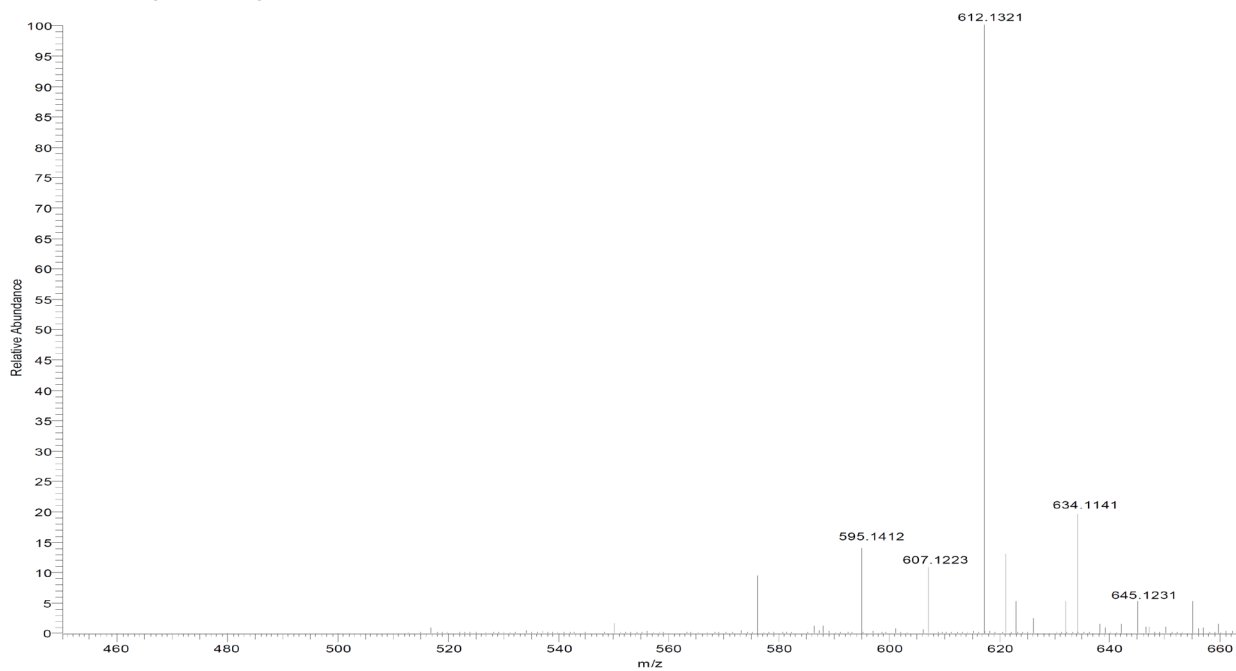

## HPLC

| No. | RT    | Area (%) | Concentration (%) | BC  |
|-----|-------|----------|-------------------|-----|
| 1   | 1.927 | 25856    | 0.145             | BV  |
| 2   | 2.340 | 56014    | 0.314             | VV  |
| 3   | 3.180 | 41491    | 0.232             | VV  |
| 4   | 3.893 | 564929   | 3.163             | VV  |
| 5   | 4.627 | 17168353 | 96.126            | VV  |
| 6   | 6.293 | 3631     | 0.020             | TBB |
|     |       | 17860274 | 100.00            |     |

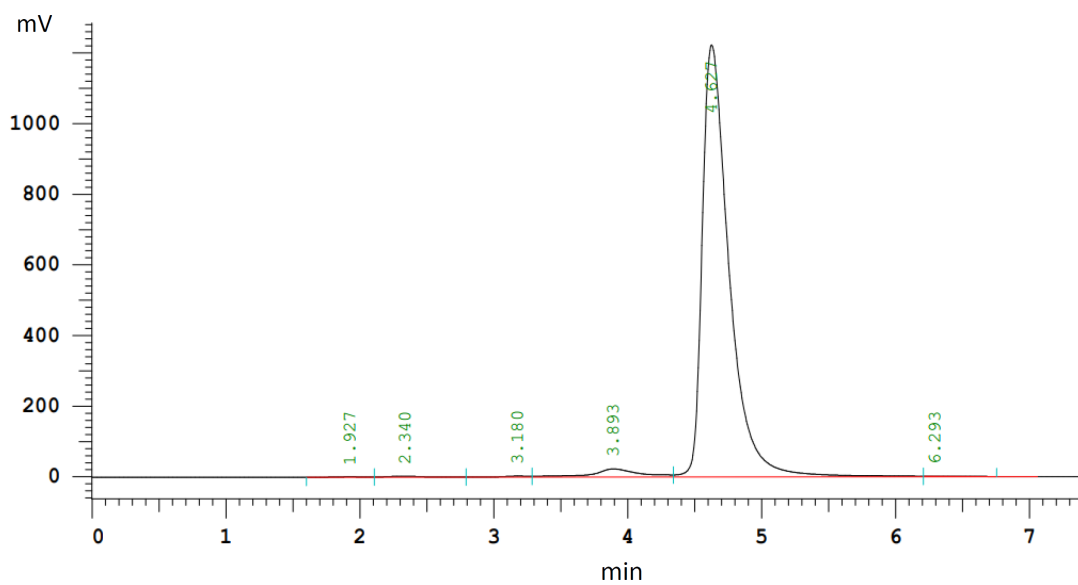

1-(2,3,4,6-Tetra-O-acetyl-β-D-glucopyranosyl)-3-(6-carbopropoxybenzo[d]thiazole-2-yl)thiourea  
(4c)

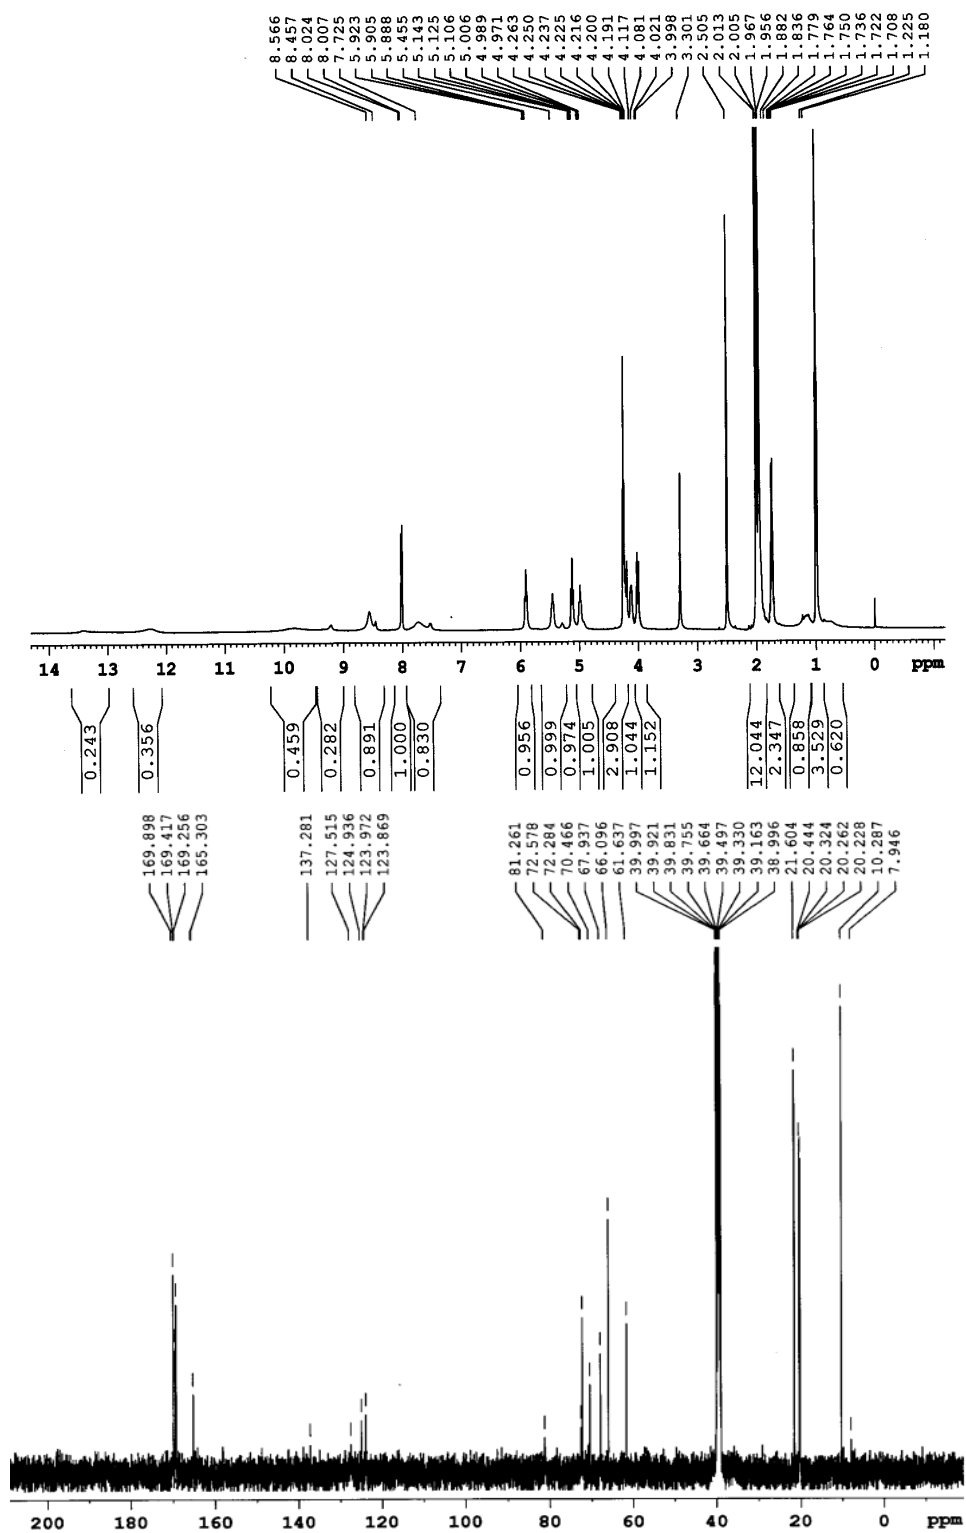



200509150922 #10 (1).4.02 (V.V) NELIOPES D.  
TMS + c ESI Full ms (50.00-2000.00)

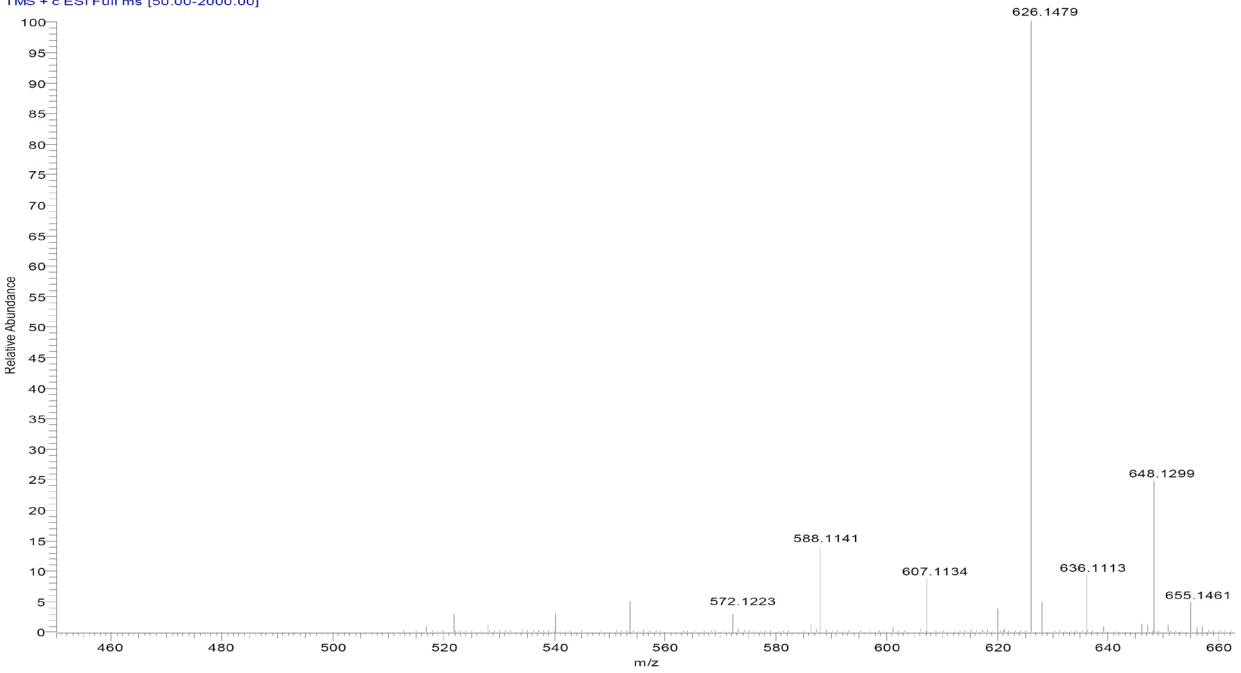

## HPLC

| No. | RT    | Area (%) | Concentration (%) | BC  |
|-----|-------|----------|-------------------|-----|
| 1   | 0.233 | 117269   | 0.979             | BV  |
| 2   | 0.733 | 310345   | 2.590             | VV  |
| 3   | 1.253 | 6941     | 0.058             | VB  |
| 4   | 1.813 | 11543559 | 96.355            | TBB |
| 5   | 3.020 | 2091     | 0.017             | BB  |
|     |       | 11980205 | 100.00            |     |

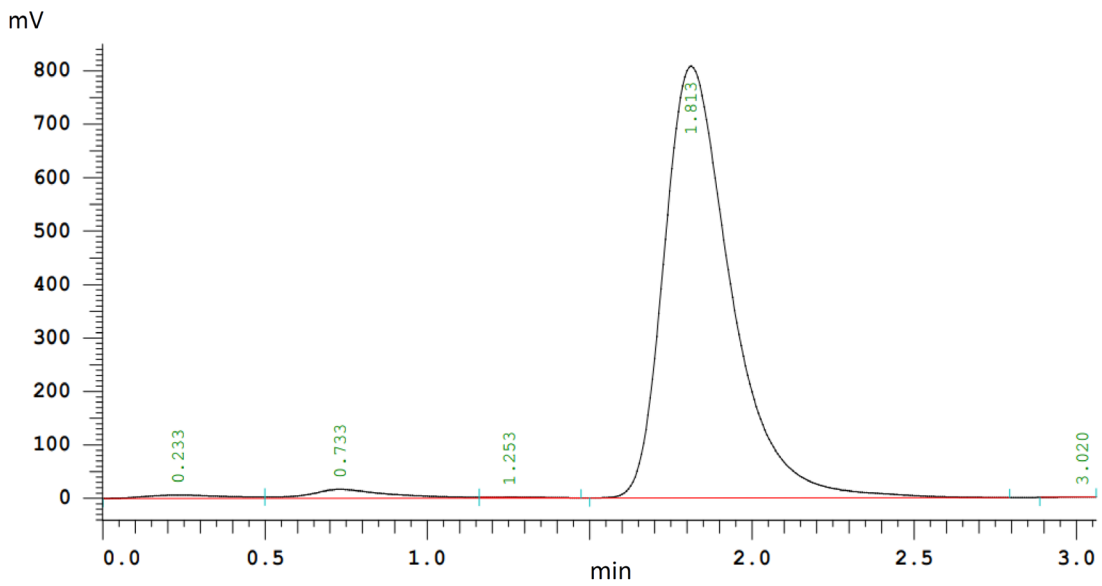

*1-(2,3,4,6-Tetra-O-acetyl-β-D-glucopyranosyl)-3-(6-carboisopropoxybenzo[d]thiazole-2-yl)thiourea (4d)*

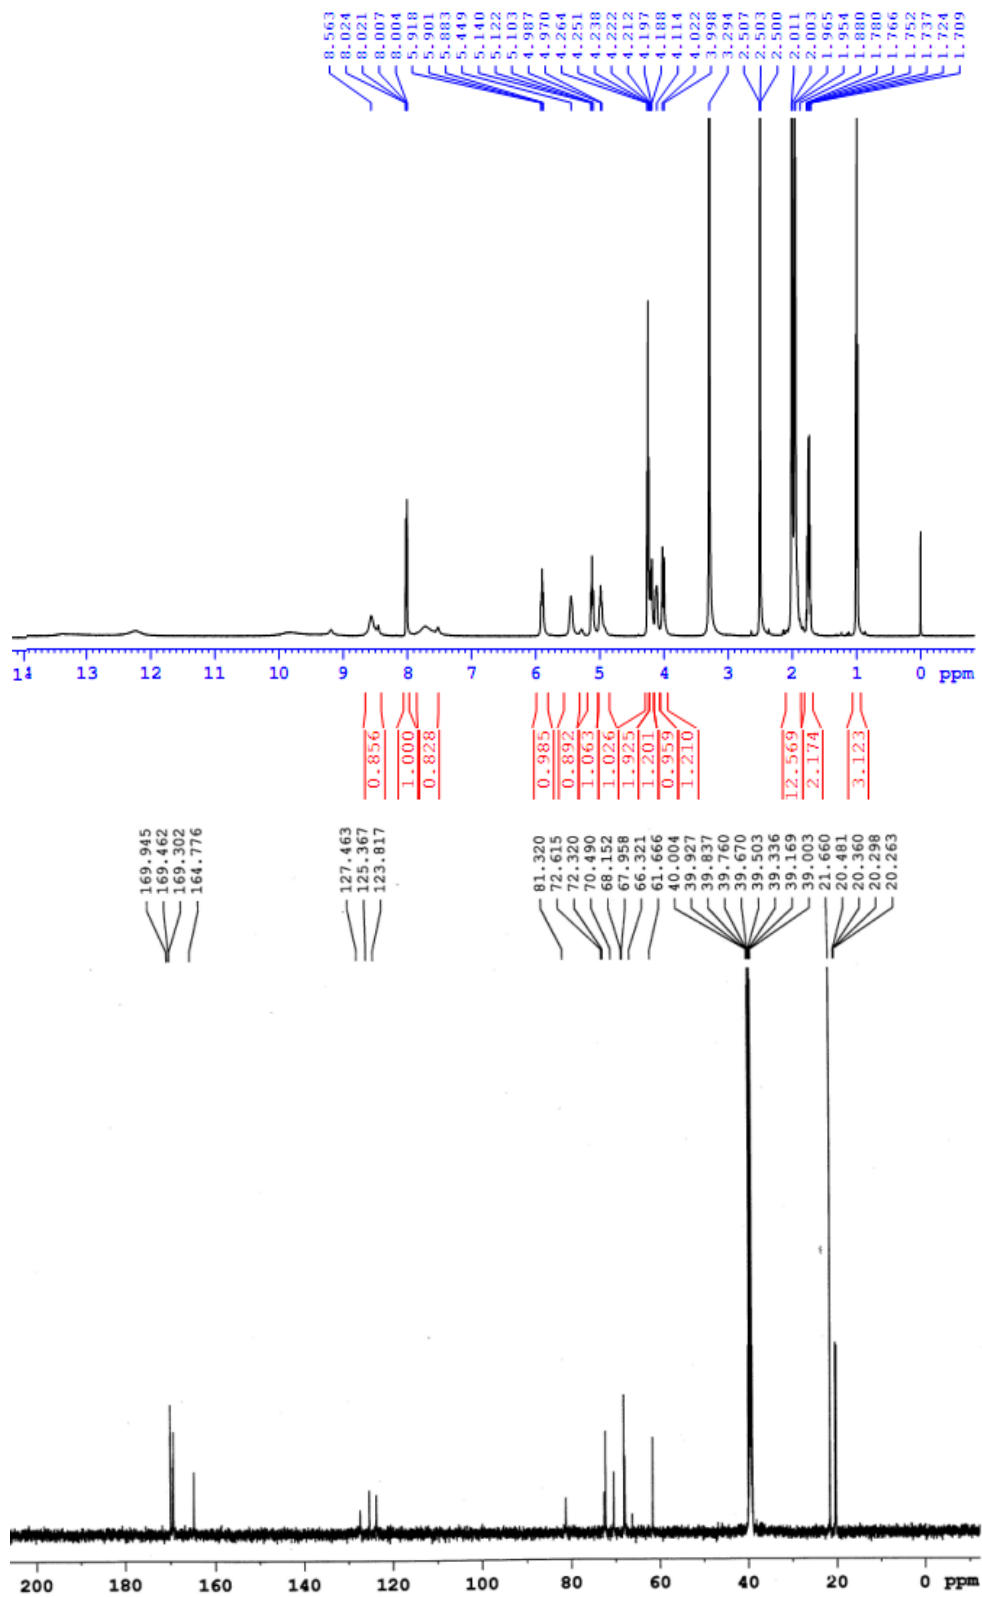

TTMS + c ESI Full ms [50.00-2000.00]

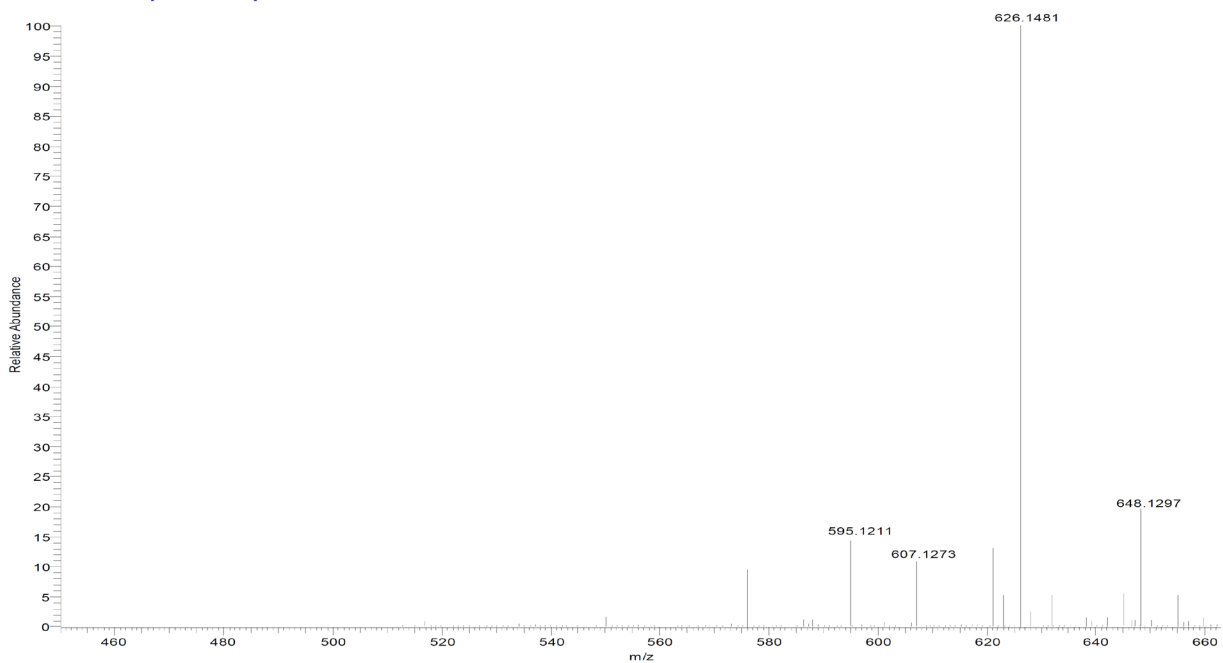

## HPLC

| No. | RT    | Area (%) | Concentration (%) | BC  |
|-----|-------|----------|-------------------|-----|
| 1   | 1.987 | 579340   | 2.964             | BV  |
| 2   | 3.060 | 18864396 | 96.529            | VV  |
| 3   | 4.013 | 8213     | 0.042             | TBB |
| 4   | 4.453 | 65138    | 0.333             | TBV |
| 5   | 4.813 | 16684    | 0.085             | TVV |
| 6   | 5.147 | 8858     | 0.045             | TVB |
|     |       | 19542647 | 100.00            |     |

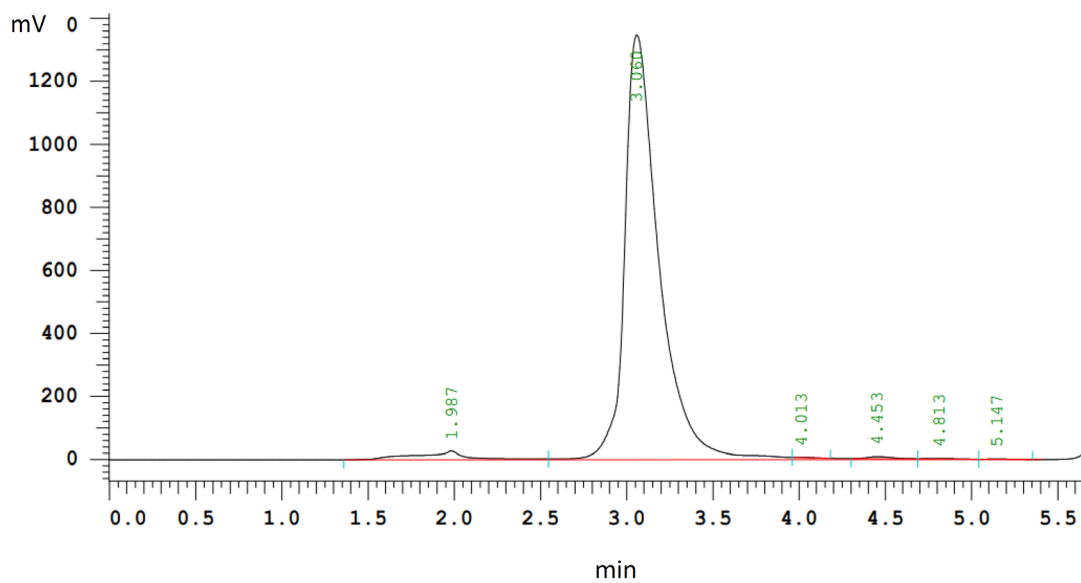

*1-(2,3,4,6-Tetra-O-acetyl-β-D-glucopyranosyl)-3-(6-carbobutoxybenzo[d]thiazole-2-yl)thiourea*  
(4e)

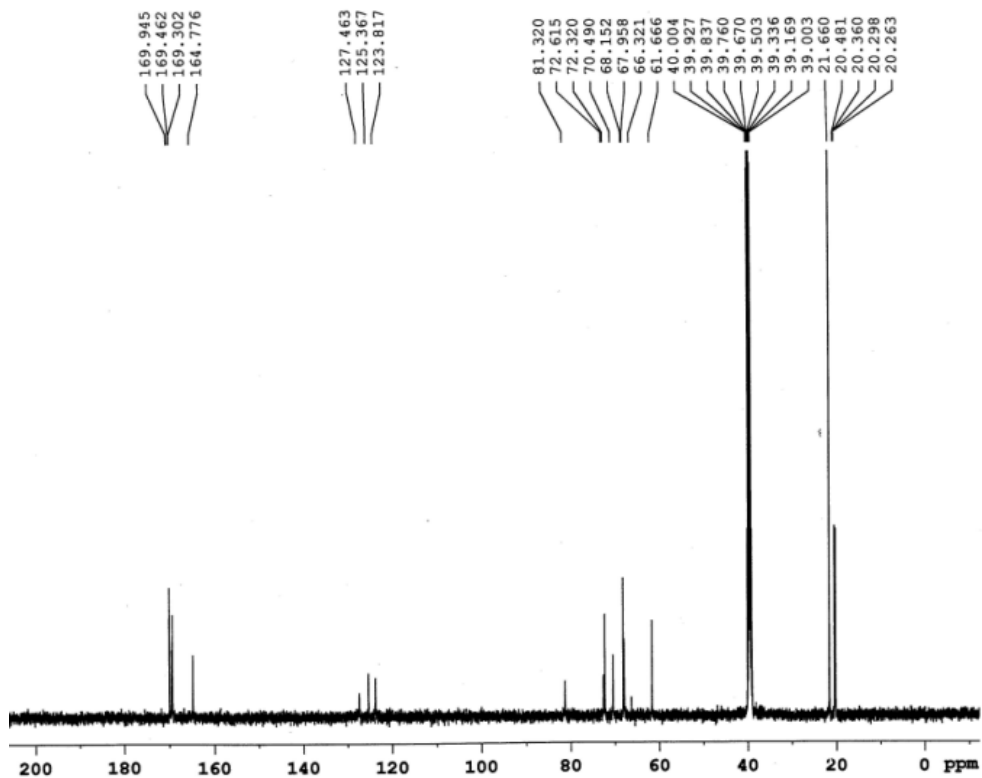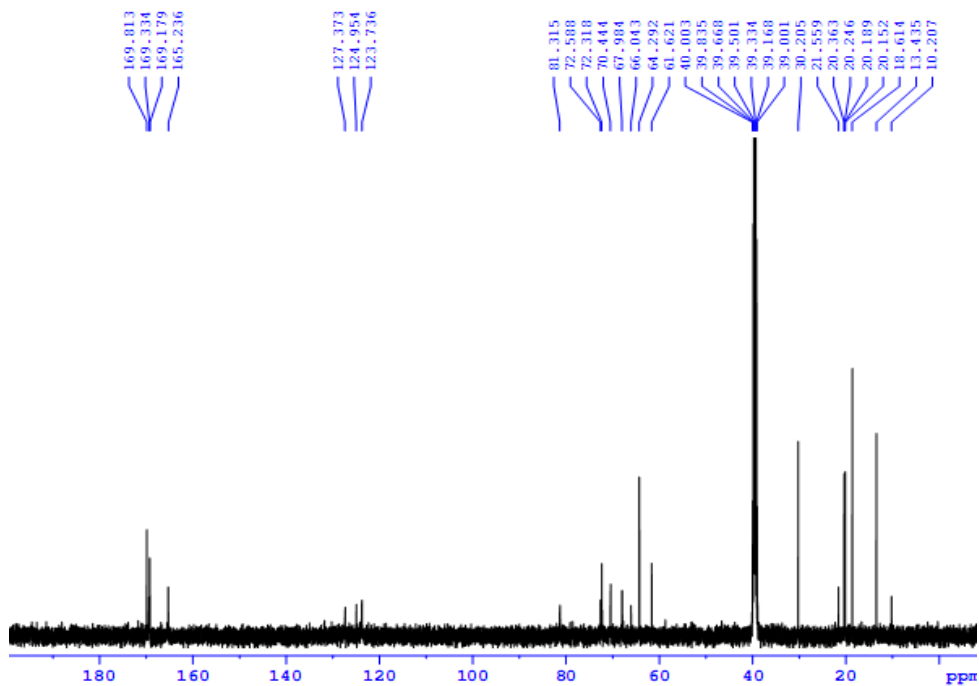

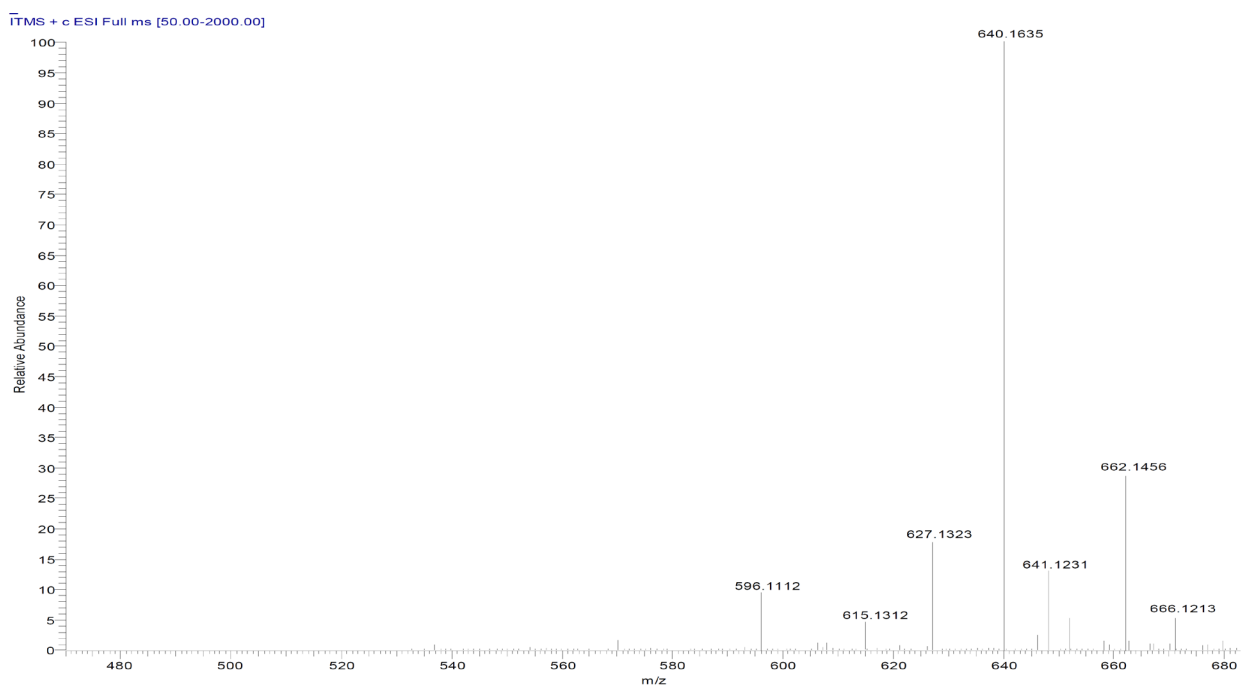

## HPLC

| No. | RT    | Area (%) | Concentration (%) | BC  |
|-----|-------|----------|-------------------|-----|
| 1   | 1.773 | 80402    | 1.102             | BV  |
| 2   | 1.967 | 98089    | 1.345             | VV  |
| 3   | 3.133 | 7101267  | 97.364            | VV  |
| 4   | 3.747 | 137930   | 0.189             | TBB |
|     |       |          | 100.00            |     |

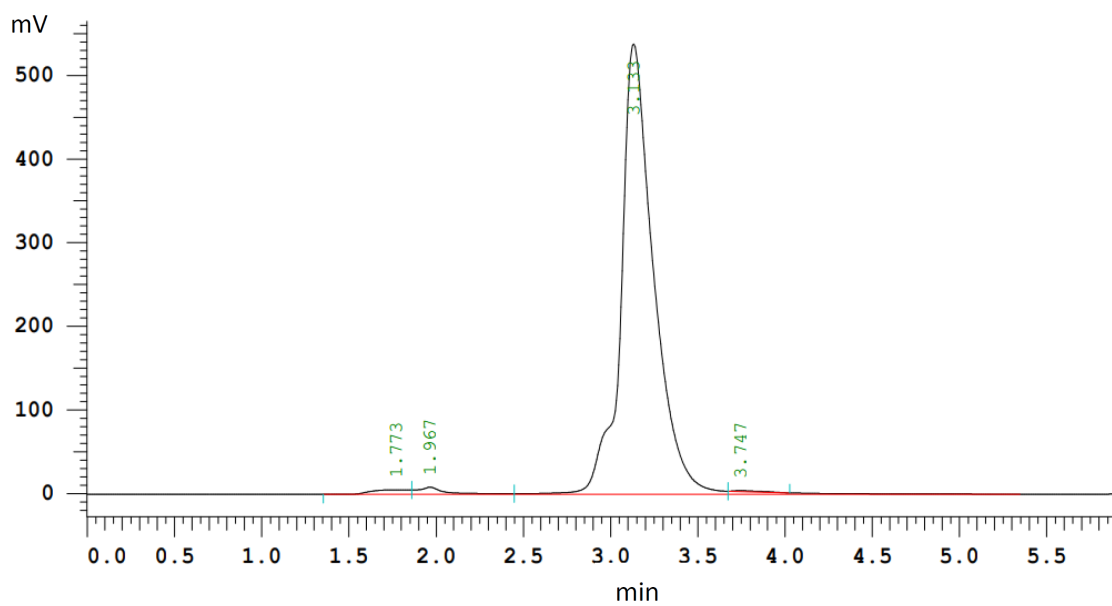

*1-(2,3,4,6-Tetra-O-acetyl-β-D-glucopyranosyl)-3-(6-carboisobutoxybenzo[d]thiazole-2-yl)thiourea*  
(4f)

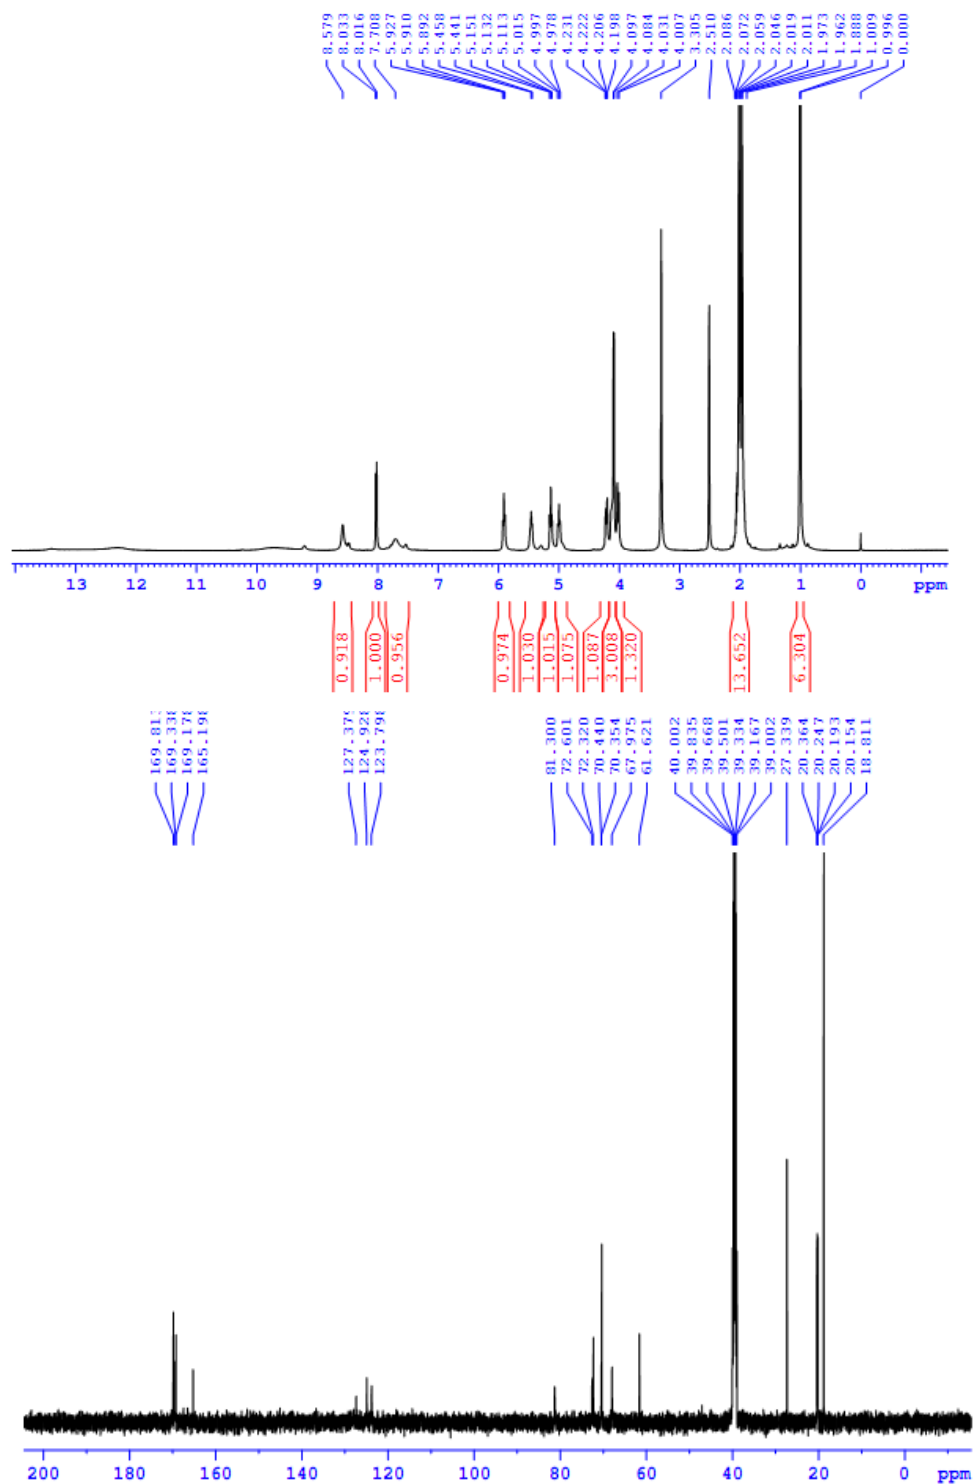

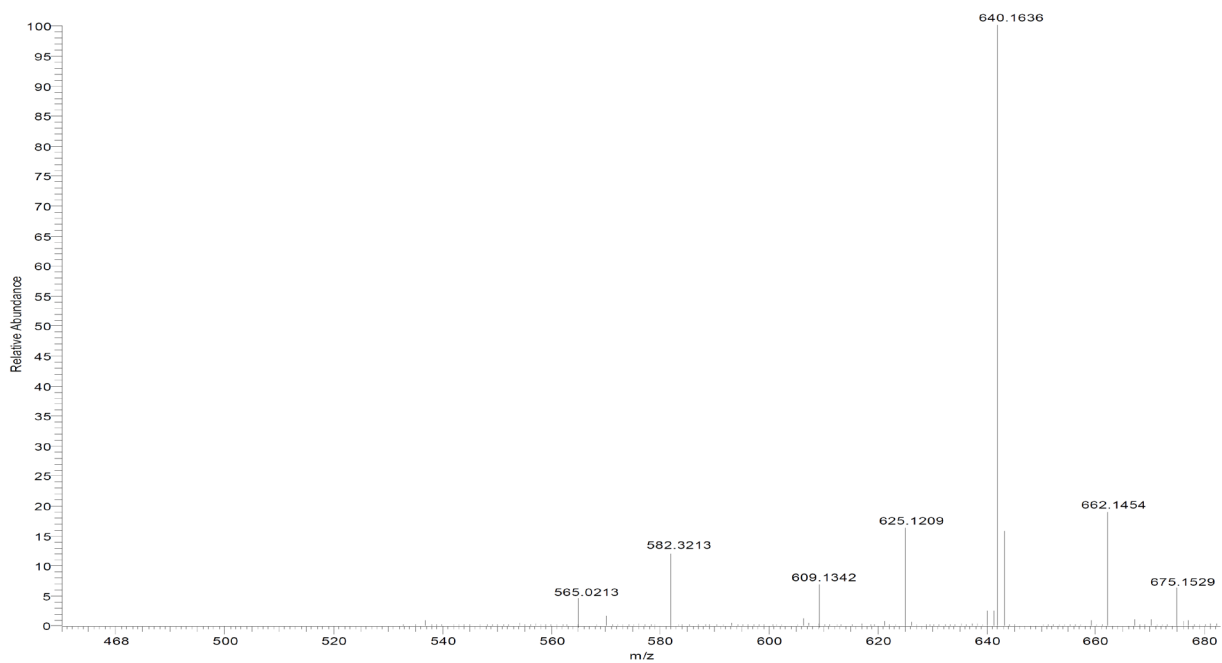

## HPLC

| No. | RT    | Area (%) | Concentration (%) | BC  |
|-----|-------|----------|-------------------|-----|
| 1   | 0.500 | 826      | 0.008             | BB  |
| 2   | 1.760 | 812      | 0.008             | BB  |
| 3   | 3.433 | 10267216 | 99.973            | BB  |
| 4   | 4.913 | 1126     | 0.011             | TBB |
|     |       | 10269980 | 100.00            |     |

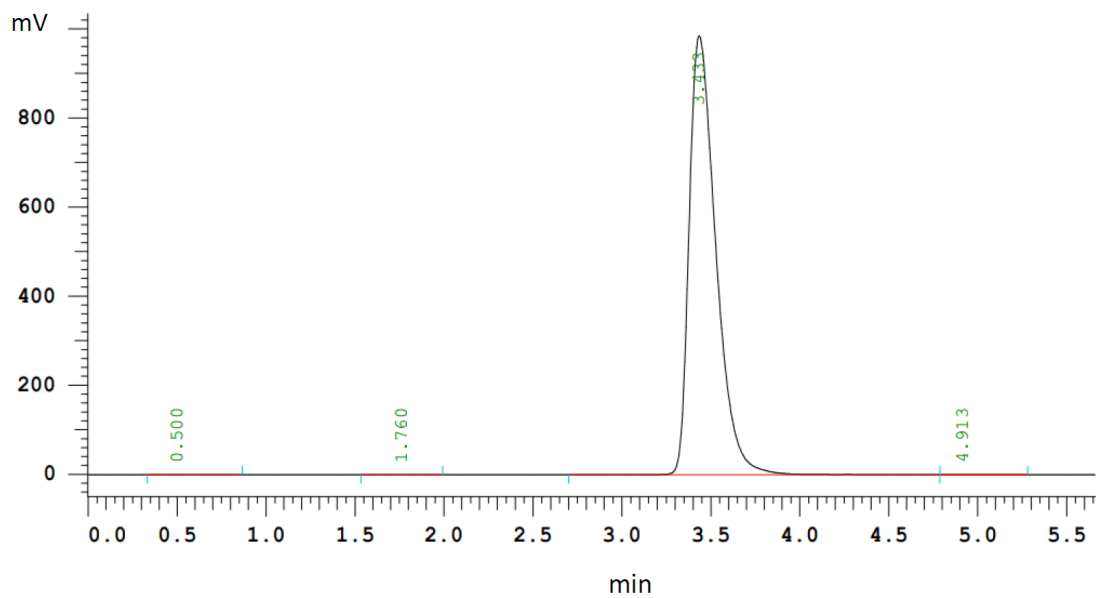

1-(2,3,4,6-Tetra-O-acetyl- $\beta$ -D-glucopyranosyl)-3-(6-carbopentoxybenzo[d]thiazole-2-yl)thiourea  
(4g)

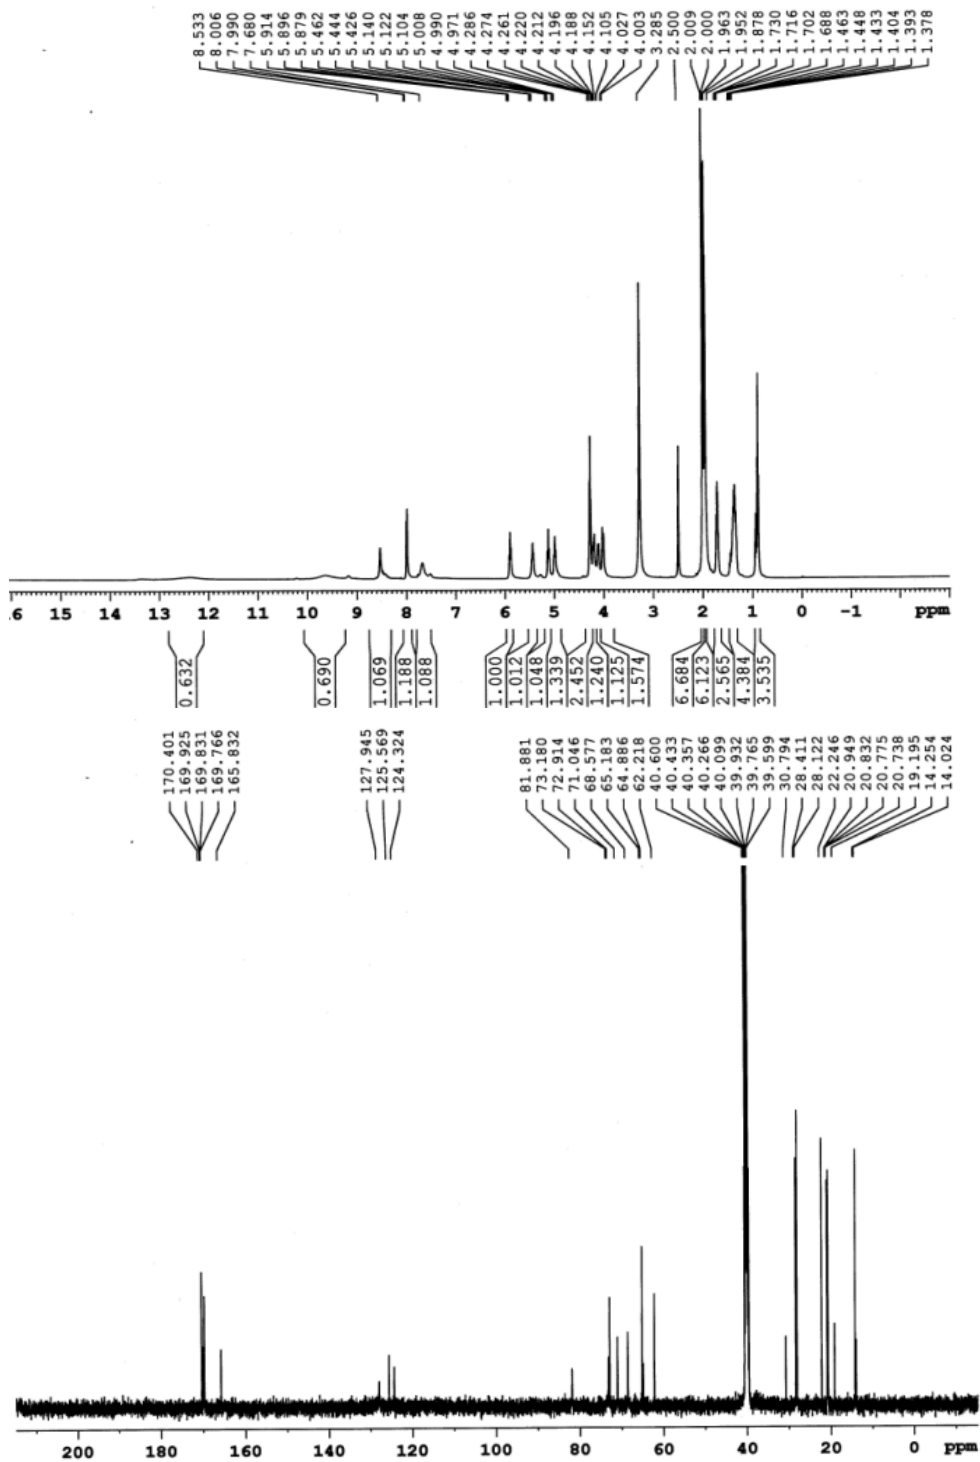



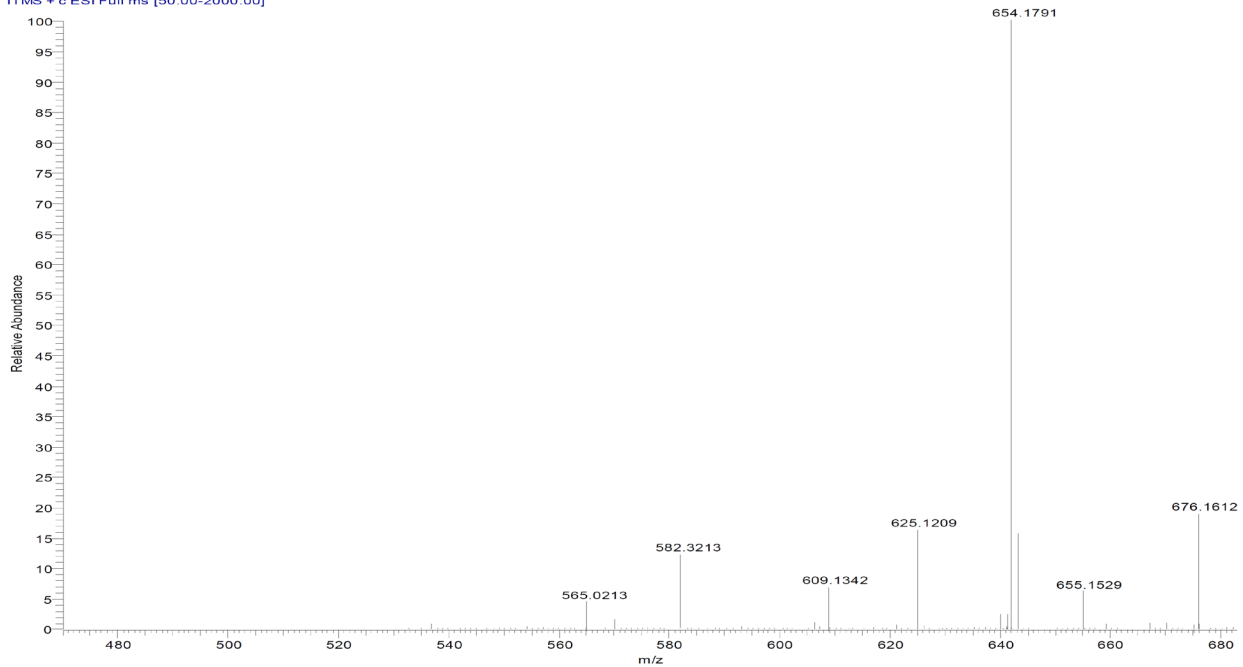

## HPLC

| No. | RT    | Area (%) | Concentration (%) | BC |
|-----|-------|----------|-------------------|----|
| 1   | 1.340 | 1964     | 0.025             | BB |
| 2   | 1.767 | 9615     | 0.123             | BB |
| 3   | 3.313 | 7817217  | 99.852            | BB |
|     |       | 7828796  | 100.00            |    |

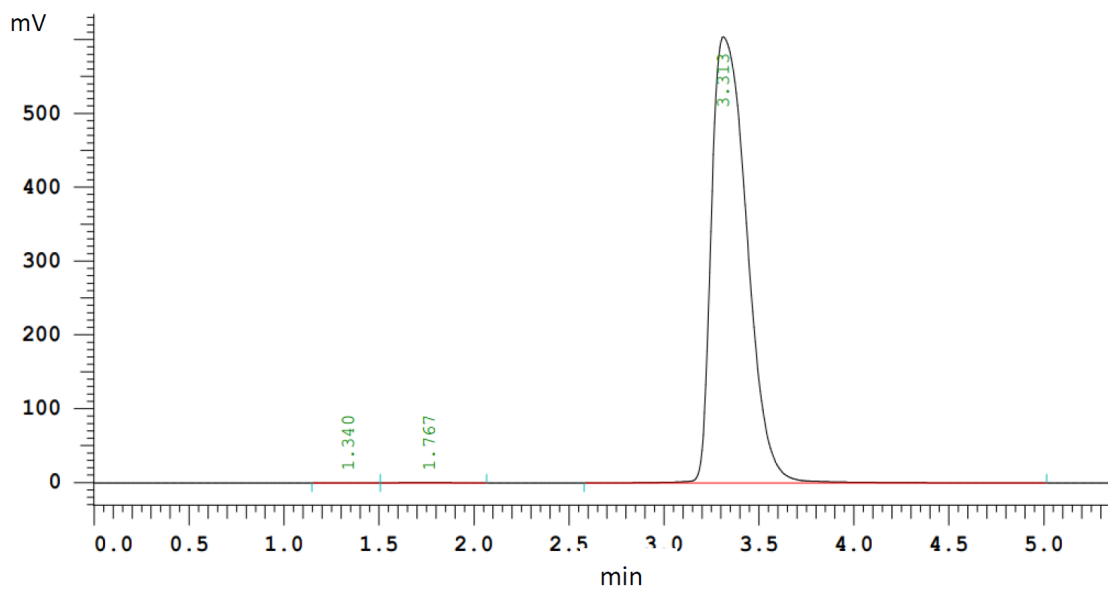

*1-(2,3,4,6-Tetra-O-acetyl-β-D-glucopyranosyl)-3-(6-carboisopentybenzo[d]thiazole-2-yl)thiourea (4h)*

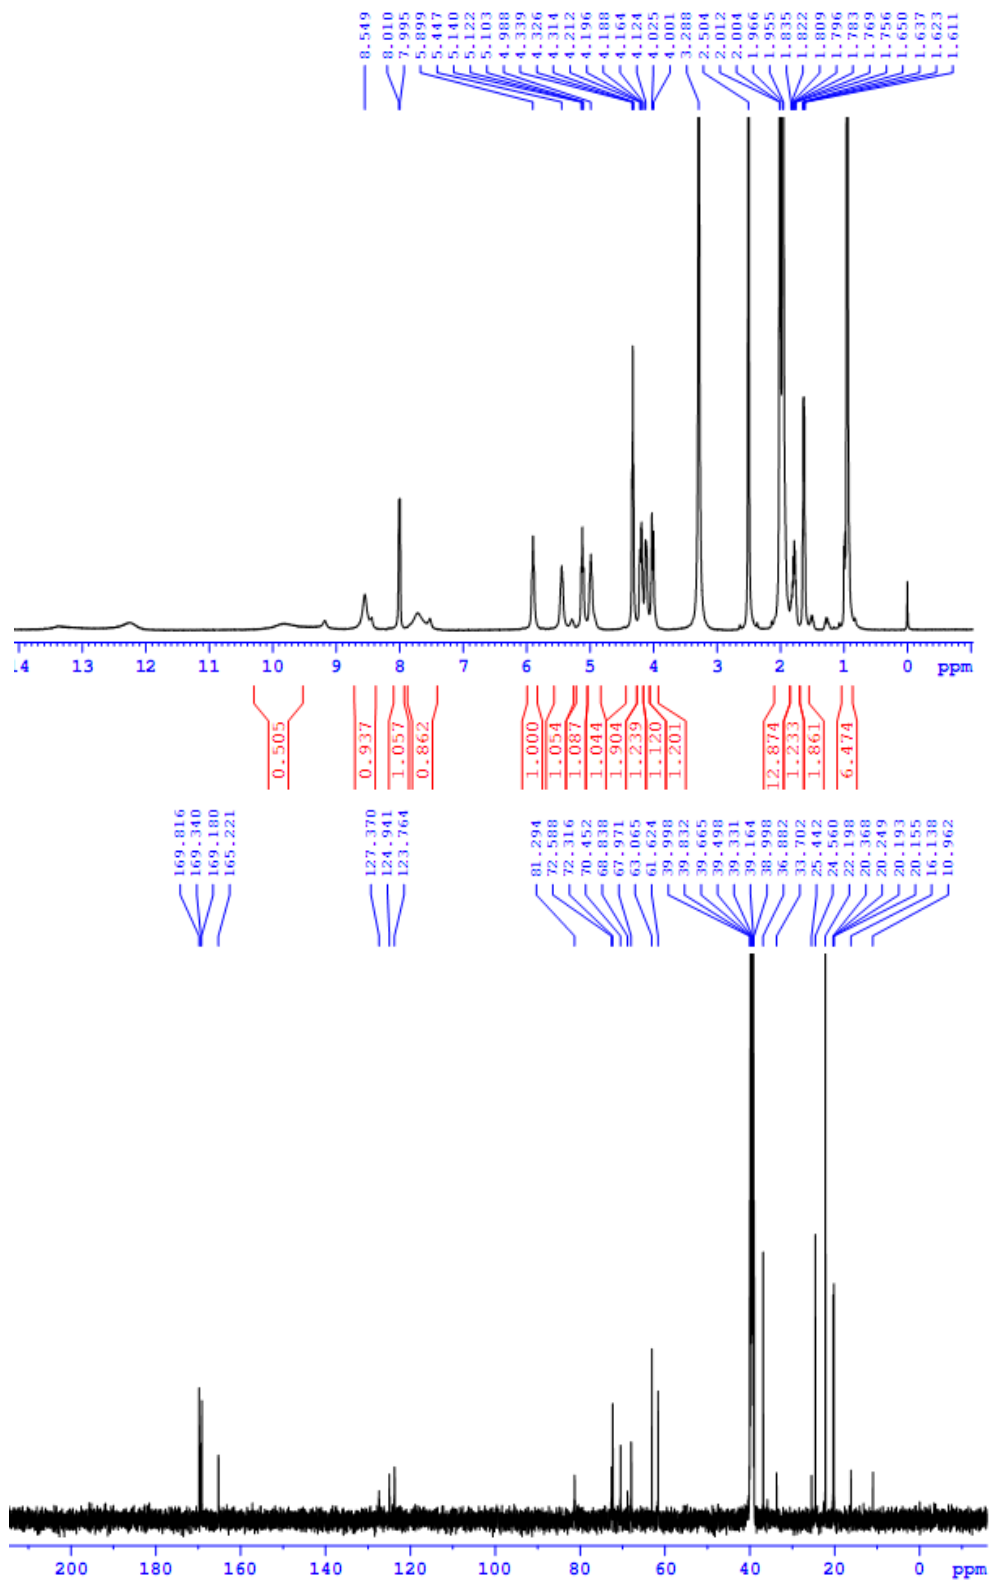

T: ITMS + c ESI Full ms [50.00-2000.00]

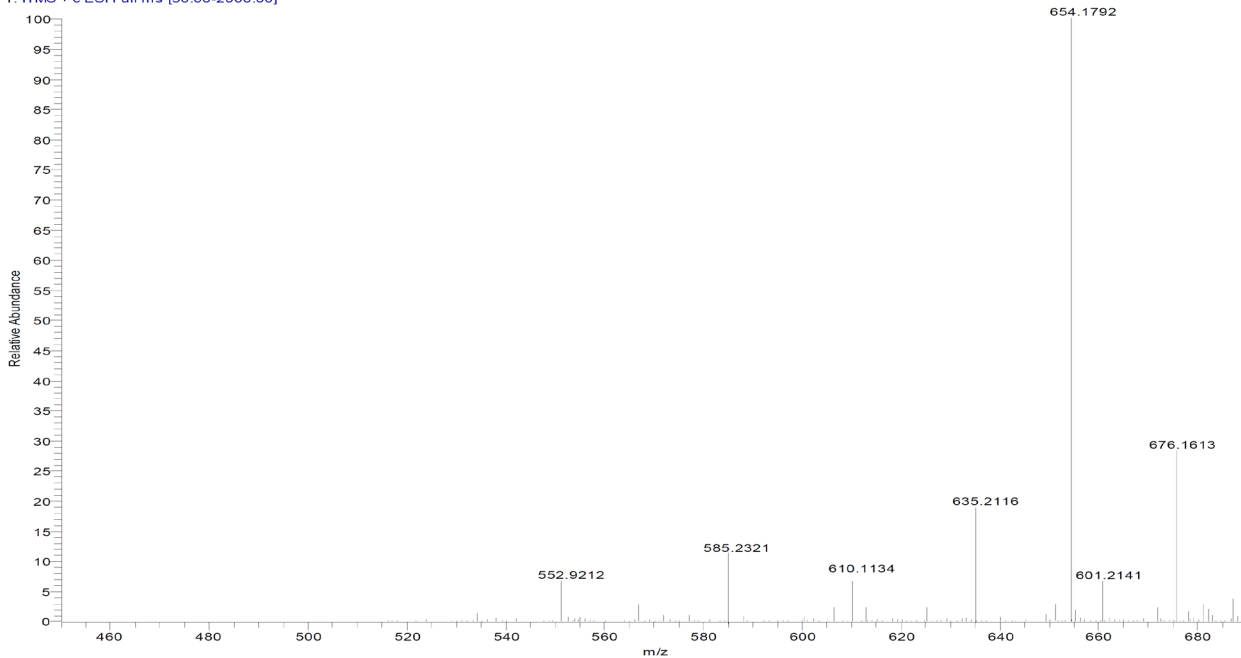

## HPLC

| No. | RT    | Area (%) | Concentration (%) | BC  |
|-----|-------|----------|-------------------|-----|
| 1   | 1.773 | 5537     | 0.105             | BB  |
| 2   | 3.200 | 131857   | 2.494             | BV  |
| 3   | 3.507 | 5119190  | 96.807            | VV  |
| 4   | 4.153 | 10559    | 0.200             | TBB |
| 5   | 4.633 | 20880    | 0.395             | TBB |
|     |       |          | 100.00            |     |

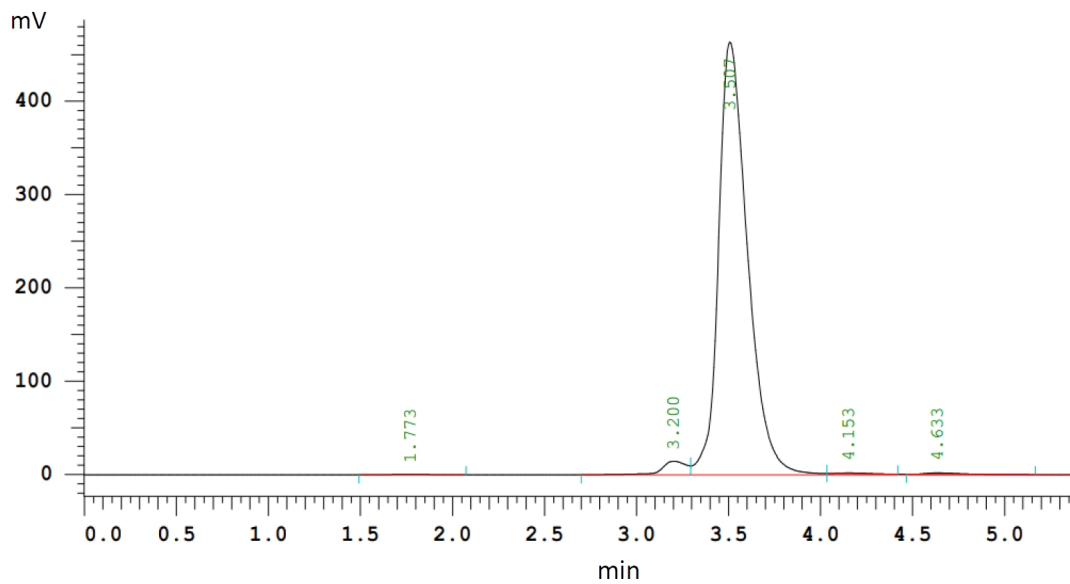

*1-(2,3,4,6-Tetra-O-acetyl-β-D-glucopyranosyl)-3-(6-carbooctyloxybenzo[d]thiazole-2-yl)thiourea*  
**(4i)**

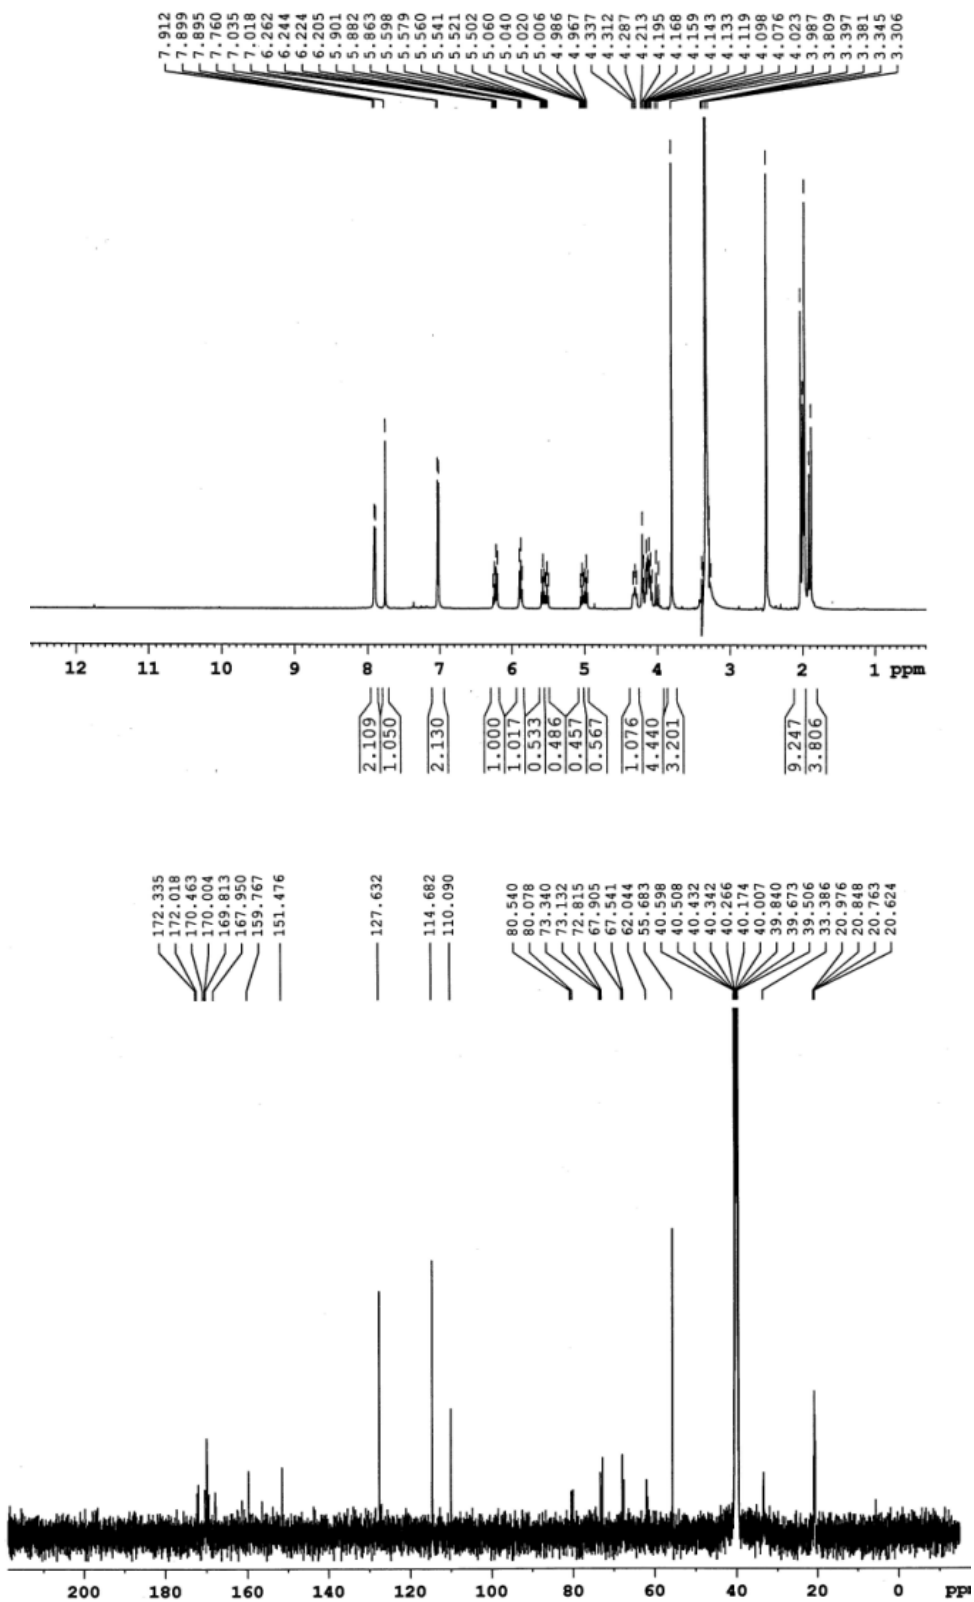

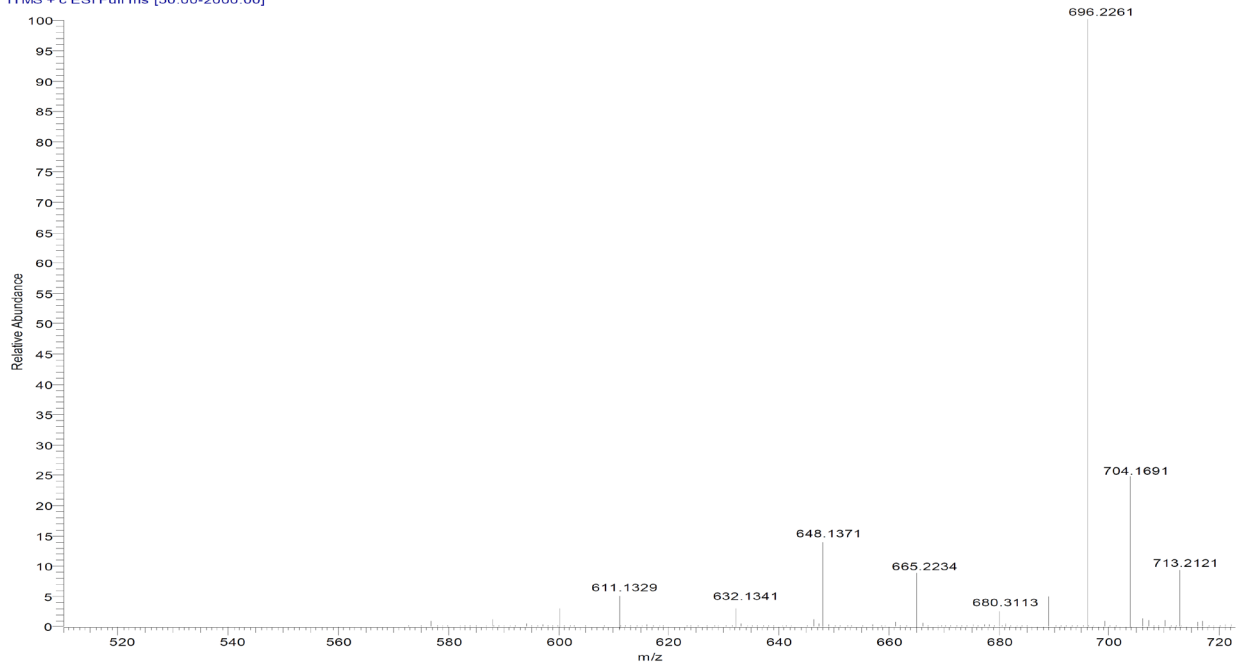

## HPLC

| No. | RT    | Area (%) | Concentration (%) | BC  |
|-----|-------|----------|-------------------|-----|
| 1   | 1.727 | 139498   | 0.681             | BV  |
| 2   | 1.967 | 198369   | 0.968             | VV  |
| 3   | 3.127 | 20094728 | 98.101            | VV  |
| 4   | 3.753 | 51104    | 0.249             | TBB |
|     |       |          | 100.00            |     |

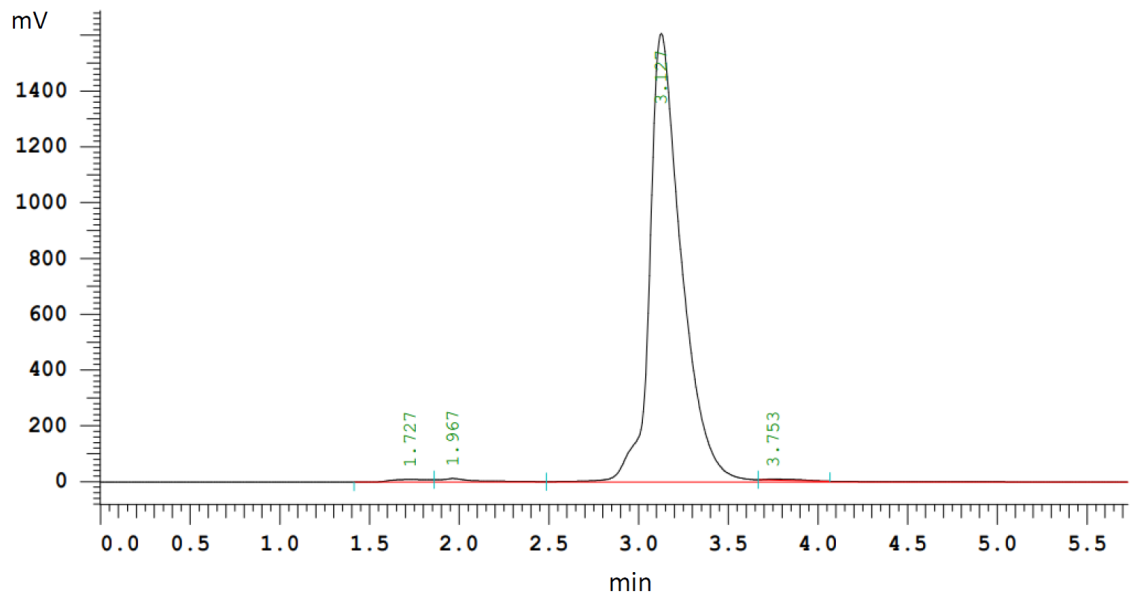

Supplement: d3nj04443b1.pdf [file d3nj04443b1.pdf]
